# Supplementary material for: Walkable urban zip codes and specific chronic diseases are associated with Sarcopenia
Source: Research Square preprint supplement (doi:10.21203/rs.3.rs-5751166/v1), 2025-12-04
Supplement: Supplementary file 1 [file 2b27e3c5d4c9f686618b4642.pdf]

**Supporting Information – Table S1**

| ICD-10  | Comorbidity Sub-Category | Description                                                              |
|---------|--------------------------|--------------------------------------------------------------------------|
| C03.0   | Cancer                   | Malignant neoplasm of upper gum                                          |
| C06.0   | Cancer                   | Malignant neoplasm of cheek mucosa                                       |
| C06.9   | Cancer                   | Malignant neoplasm of mouth, unspecified                                 |
| C09.8   | Cancer                   | Malignant neoplasm of overlapping sites of tonsil                        |
| C09.9   | Cancer                   | Malignant neoplasm of tonsil, unspecified                                |
| C10.8   | Cancer                   | Malignant neoplasm of overlapping sites of oropharynx                    |
| C10.9   | Cancer                   | Malignant neoplasm of oropharynx, unspecified                            |
| C13.9   | Cancer                   | Malignant neoplasm of hypopharynx, unspecified                           |
| C14.0   | Cancer                   | Malignant neoplasm of pharynx, unspecified                               |
| C15.4   | Cancer                   | Malignant neoplasm of middle third of esophagus                          |
| C15.5   | Cancer                   | Malignant neoplasm of lower third of esophagus                           |
| C15.9   | Cancer                   | Malignant neoplasm of esophagus, unspecified                             |
| C16.0   | Cancer                   | Malignant neoplasm of cardia                                             |
| C16.3   | Cancer                   | Malignant neoplasm of pyloric antrum                                     |
| C16.9   | Cancer                   | Malignant neoplasm of stomach, unspecified                               |
| C17.0   | Cancer                   | Malignant neoplasm of duodenum                                           |
| C17.9   | Cancer                   | Malignant neoplasm of small intestine, unspecified                       |
| C18.0   | Cancer                   | Malignant neoplasm of cecum                                              |
| C18.2   | Cancer                   | Malignant neoplasm of ascending colon                                    |
| C18.3   | Cancer                   | Malignant neoplasm of hepatic flexure                                    |
| C18.4   | Cancer                   | Malignant neoplasm of transverse colon                                   |
| C18.5   | Cancer                   | Malignant neoplasm of splenic flexure                                    |
| C18.6   | Cancer                   | Malignant neoplasm of descending colon                                   |
| C18.7   | Cancer                   | Malignant neoplasm of sigmoid colon                                      |
| C18.9   | Cancer                   | Malignant neoplasm of colon, unspecified                                 |
| C19     | Cancer                   | Malignant neoplasm of rectosigmoid junction                              |
| C20     | Cancer                   | Malignant neoplasm of rectum                                             |
| C21.0   | Cancer                   | Malignant neoplasm of anus, unspecified                                  |
| C22.0   | Cancer                   | Liver cell carcinoma                                                     |
| C22.1   | Cancer                   | Intrahepatic bile duct carcinoma                                         |
| C22.7   | Cancer                   | Other specified carcinomas of liver                                      |
| C22.8   | Cancer                   | Malignant neoplasm of liver, primary, unspecified as to type             |
| C22.9   | Cancer                   | Malignant neoplasm of liver, not specified as primary or secondary       |
| C23     | Cancer                   | Malignant neoplasm of gallbladder                                        |
| C24.1   | Cancer                   | Malignant neoplasm of ampulla of vater                                   |
| C24.9   | Cancer                   | Malignant neoplasm of biliary tract, unspecified                         |
| C25.0   | Cancer                   | Malignant neoplasm of head of pancreas                                   |
| C25.2   | Cancer                   | Malignant neoplasm of tail of pancreas                                   |
| C25.3   | Cancer                   | Malignant neoplasm of pancreatic duct                                    |
| C25.9   | Cancer                   | Malignant neoplasm of pancreas, unspecified                              |
| C26.1   | Cancer                   | Malignant neoplasm of spleen                                             |
| C31.0   | Cancer                   | Malignant neoplasm of maxillary sinus                                    |
| C32.9   | Cancer                   | Malignant neoplasm of larynx, unspecified                                |
| C34.00  | Cancer                   | Malignant neoplasm of unspecified main bronchus                          |
| C34.10  | Cancer                   | Malignant neoplasm of upper lobe, unspecified bronchus or lung           |
| C34.11  | Cancer                   | Malignant neoplasm of upper lobe, right bronchus or lung                 |
| C34.12  | Cancer                   | Malignant neoplasm of upper lobe, left bronchus or lung                  |
| C34.2   | Cancer                   | Malignant neoplasm of middle lobe, bronchus or lung                      |
| C34.31  | Cancer                   | Malignant neoplasm of lower lobe, right bronchus or lung                 |
| C34.32  | Cancer                   | Malignant neoplasm of lower lobe, left bronchus or lung                  |
| C34.80  | Cancer                   | Malignant neoplasm of overlapping sites of unspecified bronchus and lung |
| C34.81  | Cancer                   | Malignant neoplasm of overlapping sites of right bronchus and lung       |
| C34.82  | Cancer                   | Malignant neoplasm of overlapping sites of left bronchus and lung        |
| C34.90  | Cancer                   | Malignant neoplasm of unspecified part of unspecified bronchus or lung   |
| C34.91  | Cancer                   | Malignant neoplasm of unspecified part of right bronchus or lung         |
| C34.92  | Cancer                   | Malignant neoplasm of unspecified part of left bronchus or lung          |
| C38.0   | Cancer                   | Malignant neoplasm of heart                                              |
| C40.22  | Cancer                   | Malignant neoplasm of long bones of left lower limb                      |
| C41.0   | Cancer                   | Malignant neoplasm of bones of skull and face                            |
| C43.10  | Cancer                   | Malignant melanoma of unspecified eyelid, including canthus              |
| C43.121 | Cancer                   | Malignant melanoma of left upper eyelid, including canthus               |
| C43.22  | Cancer                   | Malignant melanoma of left ear and external auricular canal              |
| C43.30  | Cancer                   | Malignant melanoma of unspecified part of face                           |
| C43.39  | Cancer                   | Malignant melanoma of other parts of face                                |
| C43.4   | Cancer                   | Malignant melanoma of scalp and neck                                     |
| C43.52  | Cancer                   | Malignant melanoma of skin of breast                                     |
| C43.59  | Cancer                   | Malignant melanoma of other part of trunk                                |
| C43.61  | Cancer                   | Malignant melanoma of right upper limb, including shoulder               |
| C43.62  | Cancer                   | Malignant melanoma of left upper limb, including shoulder                |

|          |        |                                                                                         |
|----------|--------|-----------------------------------------------------------------------------------------|
| C43.72   | Cancer | Malignant melanoma of left lower limb, including hip                                    |
| C43.9    | Cancer | Malignant melanoma of skin, unspecified                                                 |
| C44.01   | Cancer | Basal cell carcinoma of skin of lip                                                     |
| C44.02   | Cancer | Squamous cell carcinoma of skin of lip                                                  |
| C44.111  | Cancer | Basal cell carcinoma of skin of unspecified eyelid, including canthus                   |
| C44.1192 | Cancer | Basal cell carcinoma of skin of left lower eyelid, including canthus                    |
| C44.209  | Cancer | Unspecified malignant neoplasm of skin of left ear and external auricular canal         |
| C44.212  | Cancer | Basal cell carcinoma of skin of right ear and external auricular canal                  |
| C44.219  | Cancer | Basal cell carcinoma of skin of left ear and external auricular canal                   |
| C44.221  | Cancer | Squamous cell carcinoma of skin of unspecified ear and external auricular canal         |
| C44.222  | Cancer | Squamous cell carcinoma of skin of right ear and external auricular canal               |
| C44.229  | Cancer | Squamous cell carcinoma of skin of left ear and external auricular canal                |
| C44.300  | Cancer | Unspecified malignant neoplasm of skin of unspecified part of face                      |
| C44.301  | Cancer | Unspecified malignant neoplasm of skin of nose                                          |
| C44.309  | Cancer | Unspecified malignant neoplasm of skin of other parts of face                           |
| C44.310  | Cancer | Basal cell carcinoma of skin of unspecified parts of face                               |
| C44.311  | Cancer | Basal cell carcinoma of skin of nose                                                    |
| C44.319  | Cancer | Basal cell carcinoma of skin of other parts of face                                     |
| C44.320  | Cancer | Squamous cell carcinoma of skin of unspecified parts of face                            |
| C44.321  | Cancer | Squamous cell carcinoma of skin of nose                                                 |
| C44.329  | Cancer | Squamous cell carcinoma of skin of other parts of face                                  |
| C44.391  | Cancer | Other specified malignant neoplasm of skin of nose                                      |
| C44.399  | Cancer | Other specified malignant neoplasm of skin of other parts of face                       |
| C44.41   | Cancer | Basal cell carcinoma of skin of scalp and neck                                          |
| C44.42   | Cancer | Squamous cell carcinoma of skin of scalp and neck                                       |
| C44.49   | Cancer | Other specified malignant neoplasm of skin of scalp and neck                            |
| C44.519  | Cancer | Basal cell carcinoma of skin of other part of trunk                                     |
| C44.520  | Cancer | Squamous cell carcinoma of anal skin                                                    |
| C44.521  | Cancer | Squamous cell carcinoma of skin of breast                                               |
| C44.529  | Cancer | Squamous cell carcinoma of skin of other part of trunk                                  |
| C44.602  | Cancer | Unspecified malignant neoplasm of skin of right upper limb, including shoulder          |
| C44.612  | Cancer | Basal cell carcinoma of skin of right upper limb, including shoulder                    |
| C44.619  | Cancer | Basal cell carcinoma of skin of left upper limb, including shoulder                     |
| C44.621  | Cancer | Squamous cell carcinoma of skin of unspecified upper limb, including shoulder           |
| C44.622  | Cancer | Squamous cell carcinoma of skin of right upper limb, including shoulder                 |
| C44.629  | Cancer | Squamous cell carcinoma of skin of left upper limb, including shoulder                  |
| C44.692  | Cancer | Other specified malignant neoplasm of skin of right upper limb, including shoulder      |
| C44.699  | Cancer | Other specified malignant neoplasm of skin of left upper limb, including shoulder       |
| C44.711  | Cancer | Basal cell carcinoma of skin of unspecified lower limb, including hip                   |
| C44.712  | Cancer | Basal cell carcinoma of skin of right lower limb, including hip                         |
| C44.719  | Cancer | Basal cell carcinoma of skin of left lower limb, including hip                          |
| C44.721  | Cancer | Squamous cell carcinoma of skin of unspecified lower limb, including hip                |
| C44.722  | Cancer | Squamous cell carcinoma of skin of right lower limb, including hip                      |
| C44.729  | Cancer | Squamous cell carcinoma of skin of left lower limb, including hip                       |
| C44.792  | Cancer | Other specified malignant neoplasm of skin of right lower limb, including hip           |
| C44.81   | Cancer | Basal cell carcinoma of overlapping sites of skin                                       |
| C44.90   | Cancer | Unspecified malignant neoplasm of skin, unspecified                                     |
| C44.91   | Cancer | Basal cell carcinoma of skin, unspecified                                               |
| C44.92   | Cancer | Squamous cell carcinoma of skin, unspecified                                            |
| C44.99   | Cancer | Other specified malignant neoplasm of skin, unspecified                                 |
| C45.0    | Cancer | Mesothelioma of pleura                                                                  |
| C48.1    | Cancer | Malignant neoplasm of specified parts of peritoneum                                     |
| C48.2    | Cancer | Malignant neoplasm of peritoneum, unspecified                                           |
| C49.12   | Cancer | Malignant neoplasm of connective and soft tissue of left upper limb, including shoulder |
| C49.9    | Cancer | Malignant neoplasm of connective and soft tissue, unspecified                           |
| C4A.4    | Cancer | Merkel cell carcinoma of scalp and neck                                                 |
| C50.021  | Cancer | Malignant neoplasm of nipple and areola, right male breast                              |
| C50.111  | Cancer | Malignant neoplasm of central portion of right female breast                            |
| C50.112  | Cancer | Malignant neoplasm of central portion of left female breast                             |
| C50.121  | Cancer | Malignant neoplasm of central portion of right male breast                              |
| C50.211  | Cancer | Malignant neoplasm of upper-inner quadrant of right female breast                       |
| C50.212  | Cancer | Malignant neoplasm of upper-inner quadrant of left female breast                        |
| C50.311  | Cancer | Malignant neoplasm of lower-inner quadrant of right female breast                       |
| C50.411  | Cancer | Malignant neoplasm of upper-outer quadrant of right female breast                       |
| C50.412  | Cancer | Malignant neoplasm of upper-outer quadrant of left female breast                        |
| C50.511  | Cancer | Malignant neoplasm of lower-outer quadrant of right female breast                       |
| C50.521  | Cancer | Malignant neoplasm of lower-outer quadrant of right male breast                         |
| C50.811  | Cancer | Malignant neoplasm of overlapping sites of right female breast                          |
| C50.812  | Cancer | Malignant neoplasm of overlapping sites of left female breast                           |
| C50.821  | Cancer | Malignant neoplasm of overlapping sites of right male breast                            |
| C50.911  | Cancer | Malignant neoplasm of unspecified site of right female breast                           |
| C50.912  | Cancer | Malignant neoplasm of unspecified site of left female breast                            |

|         |        |                                                                                        |
|---------|--------|----------------------------------------------------------------------------------------|
| C50.919 | Cancer | Malignant neoplasm of unspecified site of unspecified female breast                    |
| C50.921 | Cancer | Malignant neoplasm of unspecified site of right male breast                            |
| C50.929 | Cancer | Malignant neoplasm of unspecified site of unspecified male breast                      |
| C52     | Cancer | Malignant neoplasm of vagina                                                           |
| C53.0   | Cancer | Malignant neoplasm of endocervix                                                       |
| C53.9   | Cancer | Malignant neoplasm of cervix uteri, unspecified                                        |
| C54.1   | Cancer | Malignant neoplasm of endometrium                                                      |
| C54.8   | Cancer | Malignant neoplasm of overlapping sites of corpus uteri                                |
| C54.9   | Cancer | Malignant neoplasm of corpus uteri, unspecified                                        |
| C55     | Cancer | Malignant neoplasm of uterus, part unspecified                                         |
| C56.1   | Cancer | Malignant neoplasm of right ovary                                                      |
| C56.2   | Cancer | Malignant neoplasm of left ovary                                                       |
| C56.3   | Cancer | Malignant neoplasm of bilateral ovaries                                                |
| C56.9   | Cancer | Malignant neoplasm of unspecified ovary                                                |
| C57.00  | Cancer | Malignant neoplasm of unspecified fallopian tube                                       |
| C60.1   | Cancer | Malignant neoplasm of glans penis                                                      |
| C60.9   | Cancer | Malignant neoplasm of penis, unspecified                                               |
| C61     | Cancer | Malignant neoplasm of prostate                                                         |
| C62.90  | Cancer | Malignant neoplasm of unspecified testis, unspecified whether descended or undescended |
| C64.1   | Cancer | Malignant neoplasm of right kidney, except renal pelvis                                |
| C64.2   | Cancer | Malignant neoplasm of left kidney, except renal pelvis                                 |
| C64.9   | Cancer | Malignant neoplasm of unspecified kidney, except renal pelvis                          |
| C65.1   | Cancer | Malignant neoplasm of right renal pelvis                                               |
| C66.2   | Cancer | Malignant neoplasm of left ureter                                                      |
| C67.0   | Cancer | Malignant neoplasm of trigone of bladder                                               |
| C67.1   | Cancer | Malignant neoplasm of dome of bladder                                                  |
| C67.2   | Cancer | Malignant neoplasm of lateral wall of bladder                                          |
| C67.3   | Cancer | Malignant neoplasm of anterior wall of bladder                                         |
| C67.4   | Cancer | Malignant neoplasm of posterior wall of bladder                                        |
| C67.6   | Cancer | Malignant neoplasm of ureteric orifice                                                 |
| C67.8   | Cancer | Malignant neoplasm of overlapping sites of bladder                                     |
| C67.9   | Cancer | Malignant neoplasm of bladder, unspecified                                             |
| C68.0   | Cancer | Malignant neoplasm of urethra                                                          |
| C68.9   | Cancer | Malignant neoplasm of urinary organ, unspecified                                       |
| C69.30  | Cancer | Malignant neoplasm of unspecified choroid                                              |
| C73     | Cancer | Malignant neoplasm of thyroid gland                                                    |
| C76.0   | Cancer | Malignant neoplasm of head, face and neck                                              |
| C76.2   | Cancer | Malignant neoplasm of abdomen                                                          |
| C77.0   | Cancer | Secondary and unspecified malignant neoplasm of lymph nodes of head, face and neck     |
| C77.1   | Cancer | Secondary and unspecified malignant neoplasm of intrathoracic lymph nodes              |
| C77.2   | Cancer | Secondary and unspecified malignant neoplasm of intra-abdominal lymph nodes            |
| C77.3   | Cancer | Secondary and unspecified malignant neoplasm of axilla and upper limb lymph nodes      |
| C77.4   | Cancer | Secondary and unspecified malignant neoplasm of inguinal and lower limb lymph nodes    |
| C77.5   | Cancer | Secondary and unspecified malignant neoplasm of intrapelvic lymph nodes                |
| C77.8   | Cancer | Secondary and unspecified malignant neoplasm of lymph nodes of multiple regions        |
| C77.9   | Cancer | Secondary and unspecified malignant neoplasm of lymph node, unspecified                |
| C78.00  | Cancer | Secondary malignant neoplasm of unspecified lung                                       |
| C78.01  | Cancer | Secondary malignant neoplasm of right lung                                             |
| C78.02  | Cancer | Secondary malignant neoplasm of left lung                                              |
| C78.1   | Cancer | Secondary malignant neoplasm of mediastinum                                            |
| C78.2   | Cancer | Secondary malignant neoplasm of pleura                                                 |
| C78.4   | Cancer | Secondary malignant neoplasm of small intestine                                        |
| C78.5   | Cancer | Secondary malignant neoplasm of large intestine and rectum                             |
| C78.6   | Cancer | Secondary malignant neoplasm of retroperitoneum and peritoneum                         |
| C78.7   | Cancer | Secondary malignant neoplasm of liver and intrahepatic bile duct                       |
| C78.89  | Cancer | Secondary malignant neoplasm of other digestive organs                                 |
| C79.01  | Cancer | Secondary malignant neoplasm of right kidney and renal pelvis                          |
| C79.10  | Cancer | Secondary malignant neoplasm of unspecified urinary organs                             |
| C79.19  | Cancer | Secondary malignant neoplasm of other urinary organs                                   |
| C79.31  | Cancer | Secondary malignant neoplasm of brain                                                  |
| C79.32  | Cancer | Secondary malignant neoplasm of cerebral meninges                                      |
| C79.40  | Cancer | Secondary malignant neoplasm of unspecified part of nervous system                     |
| C79.49  | Cancer | Secondary malignant neoplasm of other parts of nervous system                          |
| C79.51  | Cancer | Secondary malignant neoplasm of bone                                                   |
| C79.60  | Cancer | Secondary malignant neoplasm of unspecified ovary                                      |
| C79.71  | Cancer | Secondary malignant neoplasm of right adrenal gland                                    |
| C79.81  | Cancer | Secondary malignant neoplasm of breast                                                 |
| C79.82  | Cancer | Secondary malignant neoplasm of genital organs                                         |
| C79.89  | Cancer | Secondary malignant neoplasm of other specified sites                                  |
| C79.9   | Cancer | Secondary malignant neoplasm of unspecified site                                       |
| C7A.00  | Cancer | Malignant carcinoid tumor of unspecified site                                          |
| C7A.012 | Cancer | Malignant carcinoid tumor of the ileum                                                 |

|         |          |                                                                                                                  |
|---------|----------|------------------------------------------------------------------------------------------------------------------|
| C7A.019 | Cancer   | Malignant carcinoid tumor of the small intestine, unspecified portion                                            |
| C7A.090 | Cancer   | Malignant carcinoid tumor of the bronchus and lung                                                               |
| C7A.1   | Cancer   | Malignant poorly differentiated neuroendocrine tumors                                                            |
| C7A.8   | Cancer   | Other malignant neuroendocrine tumors                                                                            |
| C7B.00  | Cancer   | Secondary carcinoid tumors, unspecified site                                                                     |
| C7B.01  | Cancer   | Secondary carcinoid tumors of distant lymph nodes                                                                |
| C7B.09  | Cancer   | Secondary carcinoid tumors of other sites                                                                        |
| C7B.8   | Cancer   | Other secondary neuroendocrine tumors                                                                            |
| C80.1   | Cancer   | Malignant (primary) neoplasm, unspecified                                                                        |
| C80.2   | Cancer   | Malignant neoplasm associated with transplanted organ                                                            |
| C81.00  | Cancer   | Nodular lymphocyte predominant hodgkin lymphoma, unspecified site                                                |
| C81.02  | Cancer   | Nodular lymphocyte predominant hodgkin lymphoma, intrathoracic lymph nodes                                       |
| C81.12  | Cancer   | Nodular sclerosis classical hodgkin lymphoma, intrathoracic lymph nodes                                          |
| C81.17  | Cancer   | Nodular sclerosis classical hodgkin lymphoma, spleen                                                             |
| C81.90  | Cancer   | Hodgkin lymphoma, unspecified, unspecified site                                                                  |
| C82.37  | Cancer   | Follicular lymphoma grade iia, spleen                                                                            |
| C82.90  | Cancer   | Follicular lymphoma, unspecified, unspecified site                                                               |
| C82.98  | Cancer   | Follicular lymphoma, unspecified, lymph nodes of multiple sites                                                  |
| C82.99  | Cancer   | Follicular lymphoma, unspecified, extranodal and solid organ sites                                               |
| C83.00  | Cancer   | Small cell b-cell lymphoma, unspecified site                                                                     |
| C83.03  | Cancer   | Small cell b-cell lymphoma, intra-abdominal lymph nodes                                                          |
| C83.09  | Cancer   | Small cell b-cell lymphoma, extranodal and solid organ sites                                                     |
| C83.10  | Cancer   | Mantle cell lymphoma, unspecified site                                                                           |
| C83.13  | Cancer   | Mantle cell lymphoma, intra-abdominal lymph nodes                                                                |
| C83.18  | Cancer   | Mantle cell lymphoma, lymph nodes of multiple sites                                                              |
| C83.30  | Cancer   | Diffuse large b-cell lymphoma, unspecified site                                                                  |
| C83.33  | Cancer   | Diffuse large b-cell lymphoma, intra-abdominal lymph nodes                                                       |
| C83.38  | Cancer   | Diffuse large b-cell lymphoma, lymph nodes of multiple sites                                                     |
| C83.39  | Cancer   | Diffuse large b-cell lymphoma, extranodal and solid organ sites                                                  |
| C83.54  | Cancer   | Lymphoblastic (diffuse) lymphoma, lymph nodes of axilla and upper limb                                           |
| C83.80  | Cancer   | Other non-follicular lymphoma, unspecified site                                                                  |
| C84.40  | Cancer   | Peripheral t-cell lymphoma, not classified, unspecified site                                                     |
| C84.42  | Cancer   | Peripheral t-cell lymphoma, not classified, intrathoracic lymph nodes                                            |
| C84.44  | Cancer   | Peripheral t-cell lymphoma, not classified, lymph nodes of axilla and upper limb                                 |
| C84.48  | Cancer   | Peripheral t-cell lymphoma, not classified, lymph nodes of multiple sites                                        |
| C84.A9  | Cancer   | Cutaneous t-cell lymphoma, unspecified, extranodal and solid organ sites                                         |
| C85.10  | Cancer   | Unspecified b-cell lymphoma, unspecified site                                                                    |
| C85.19  | Cancer   | Unspecified b-cell lymphoma, extranodal and solid organ sites                                                    |
| C85.80  | Cancer   | Other specified types of non-hodgkin lymphoma, unspecified site                                                  |
| C85.90  | Cancer   | Non-hodgkin lymphoma, unspecified, unspecified site                                                              |
| C85.91  | Cancer   | Non-hodgkin lymphoma, unspecified, lymph nodes of head, face, and neck                                           |
| C85.92  | Cancer   | Non-hodgkin lymphoma, unspecified, intrathoracic lymph nodes                                                     |
| C88.0   | Cancer   | Waldenström macroglobulinemia                                                                                    |
| C88.9   | Cancer   | Malignant immunoproliferative disease, unspecified                                                               |
| C90.00  | Cancer   | Multiple myeloma not having achieved remission                                                                   |
| C90.01  | Cancer   | Multiple myeloma in remission                                                                                    |
| C90.02  | Cancer   | Multiple myeloma in relapse                                                                                      |
| C91.10  | Cancer   | Chronic lymphocytic leukemia of b-cell type not having achieved remission                                        |
| C91.50  | Cancer   | Adult t-cell lymphoma/leukemia (htlv-1-associated) not having achieved remission                                 |
| C91.90  | Cancer   | Lymphoid leukemia, unspecified not having achieved remission                                                     |
| C91.91  | Cancer   | Lymphoid leukemia, unspecified, in remission                                                                     |
| C91.92  | Cancer   | Lymphoid leukemia, unspecified, in relapse                                                                       |
| C92.00  | Cancer   | Acute myeloblastic leukemia, not having achieved remission                                                       |
| C92.10  | Cancer   | Chronic myeloid leukemia, bcr/abl-positive, not having achieved remission                                        |
| C92.11  | Cancer   | Chronic myeloid leukemia, bcr/abl-positive, in remission                                                         |
| C93.10  | Cancer   | Chronic myelomonocytic leukemia not having achieved remission                                                    |
| C94.6   | Cancer   | Myelodysplastic disease, not classified                                                                          |
| C95.90  | Cancer   | Leukemia, unspecified not having achieved remission                                                              |
| F01.50  | Dementia | Vascular dementia without behavioral disturbance                                                                 |
| F01.51  | Dementia | Vascular dementia with behavioral disturbance                                                                    |
| F01.518 | Dementia | Vascular dementia, unspecified severity, with other behavioral disturbances                                      |
| F02.80  | Dementia | Dementia in other diseases classified elsewhere without behavioral disturbance                                   |
| F02.81  | Dementia | Dementia in other diseases classified elsewhere with behavioral disturbance                                      |
| F03.90  | Dementia | Unspecified dementia without behavioral disturbance                                                              |
| F03.91  | Dementia | Unspecified dementia with behavioral disturbance                                                                 |
| F03.93  | Dementia | Unspecified dementia, unspecified severity, with mood disturbance                                                |
| F03.94  | Dementia | Unspecified dementia, unspecified severity, with anxiety                                                         |
| F03.A0  | Dementia | Unspecified dementia, mild, without behavioral disturbance, psychotic disturbance, mood disturbance, and anxiety |
| G30.0   | Dementia | Alzheimer's disease with early onset                                                                             |
| G30.1   | Dementia | Alzheimer's disease with late onset                                                                              |
| G30.8   | Dementia | Other alzheimer's disease                                                                                        |

|          |          |                                                                                                               |
|----------|----------|---------------------------------------------------------------------------------------------------------------|
| G30.9    | Dementia | Alzheimer's disease, unspecified                                                                              |
| G31.01   | Dementia | Pick's disease                                                                                                |
| G31.09   | Dementia | Other frontotemporal dementia                                                                                 |
| G31.83   | Dementia | Dementia with lewy bodies                                                                                     |
| E08.00   | Diabetes | Diabetes mellitus due to underlying condition with hyperosmolarity without nonketotic hyperglycemic-          |
| E08.01   | Diabetes | Diabetes mellitus due to underlying condition with hyperosmolarity with coma                                  |
| E08.21   | Diabetes | Diabetes mellitus due to underlying condition with diabetic nephropathy                                       |
| E08.22   | Diabetes | Diabetes mellitus due to underlying condition with diabetic chronic kidney disease                            |
| E08.29   | Diabetes | Diabetes mellitus due to underlying condition with other diabetic kidney complication                         |
| E08.319  | Diabetes | Diabetes mellitus due to underlying condition with unspecified diabetic retinopathy without macular edema     |
| E08.3291 | Diabetes | Diabetes mellitus due to underlying condition with mild nonproliferative diabetic retinopathy without macular |
| E08.40   | Diabetes | Diabetes mellitus due to underlying condition with diabetic neuropathy, unspecified                           |
| E08.41   | Diabetes | Diabetes mellitus due to underlying condition with diabetic mononeuropathy                                    |
| E08.42   | Diabetes | Diabetes mellitus due to underlying condition with diabetic polyneuropathy                                    |
| E08.52   | Diabetes | Diabetes mellitus due to underlying condition with diabetic peripheral angiopathy with gangrene               |
| E08.621  | Diabetes | Diabetes mellitus due to underlying condition with foot ulcer                                                 |
| E08.622  | Diabetes | Diabetes mellitus due to underlying condition with other skin ulcer                                           |
| E08.65   | Diabetes | Diabetes mellitus due to underlying condition with hyperglycemia                                              |
| E08.8    | Diabetes | Diabetes mellitus due to underlying condition with unspecified complications                                  |
| E08.9    | Diabetes | Diabetes mellitus due to underlying condition without complications                                           |
| E09.59   | Diabetes | Drug or chemical induced diabetes mellitus with other circulatory complications                               |
| E09.65   | Diabetes | Drug or chemical induced diabetes mellitus with hyperglycemia                                                 |
| E09.9    | Diabetes | Drug or chemical induced diabetes mellitus without complications                                              |
| E10.21   | Diabetes | Type 1 diabetes mellitus with diabetic nephropathy                                                            |
| E10.22   | Diabetes | Type 1 diabetes mellitus with diabetic chronic kidney disease                                                 |
| E10.29   | Diabetes | Type 1 diabetes mellitus with other diabetic kidney complication                                              |
| E10.319  | Diabetes | Type 1 diabetes mellitus with unspecified diabetic retinopathy without macular edema                          |
| E10.3393 | Diabetes | Type 1 diabetes mellitus with moderate nonproliferative diabetic retinopathy without macular edema,           |
| E10.36   | Diabetes | Type 1 diabetes mellitus with diabetic cataract                                                               |
| E10.39   | Diabetes | Type 1 diabetes mellitus with other diabetic ophthalmic complication                                          |
| E10.40   | Diabetes | Type 1 diabetes mellitus with diabetic neuropathy, unspecified                                                |
| E10.42   | Diabetes | Type 1 diabetes mellitus with diabetic polyneuropathy                                                         |
| E10.43   | Diabetes | Type 1 diabetes mellitus with diabetic autonomic (poly)neuropathy                                             |
| E10.51   | Diabetes | Type 1 diabetes mellitus with diabetic peripheral angiopathy without gangrene                                 |
| E10.52   | Diabetes | Type 1 diabetes mellitus with diabetic peripheral angiopathy with gangrene                                    |
| E10.59   | Diabetes | Type 1 diabetes mellitus with other circulatory complications                                                 |
| E10.621  | Diabetes | Type 1 diabetes mellitus with foot ulcer                                                                      |
| E10.622  | Diabetes | Type 1 diabetes mellitus with other skin ulcer                                                                |
| E10.649  | Diabetes | Type 1 diabetes mellitus with hypoglycemia without coma                                                       |
| E10.65   | Diabetes | Type 1 diabetes mellitus with hyperglycemia                                                                   |
| E10.69   | Diabetes | Type 1 diabetes mellitus with other specified complication                                                    |
| E10.8    | Diabetes | Type 1 diabetes mellitus with unspecified complications                                                       |
| E10.9    | Diabetes | Type 1 diabetes mellitus without complications                                                                |
| E11.00   | Diabetes | Type 2 diabetes mellitus with hyperosmolarity without nonketotic hyperglycemic-hyperosmolar coma              |
| E11.10   | Diabetes | Type 2 diabetes mellitus with ketoacidosis without coma                                                       |
| E11.21   | Diabetes | Type 2 diabetes mellitus with diabetic nephropathy                                                            |
| E11.22   | Diabetes | Type 2 diabetes mellitus with diabetic chronic kidney disease                                                 |
| E11.29   | Diabetes | Type 2 diabetes mellitus with other diabetic kidney complication                                              |
| E11.319  | Diabetes | Type 2 diabetes mellitus with unspecified diabetic retinopathy without macular edema                          |
| E11.3212 | Diabetes | Type 2 diabetes mellitus with mild nonproliferative diabetic retinopathy with macular edema, left eye         |
| E11.3291 | Diabetes | Type 2 diabetes mellitus with mild nonproliferative diabetic retinopathy without macular edema, right eye     |
| E11.3292 | Diabetes | Type 2 diabetes mellitus with mild nonproliferative diabetic retinopathy without macular edema, left eye      |
| E11.3293 | Diabetes | Type 2 diabetes mellitus with mild nonproliferative diabetic retinopathy without macular edema, bilateral     |
| E11.3299 | Diabetes | Type 2 diabetes mellitus with mild nonproliferative diabetic retinopathy without macular edema, unspecified   |
| E11.3393 | Diabetes | Type 2 diabetes mellitus with moderate nonproliferative diabetic retinopathy without macular edema,           |
| E11.3413 | Diabetes | Type 2 diabetes mellitus with severe nonproliferative diabetic retinopathy with macular edema, bilateral      |
| E11.3493 | Diabetes | Type 2 diabetes mellitus with severe nonproliferative diabetic retinopathy without macular edema, bilateral   |
| E11.3499 | Diabetes | Type 2 diabetes mellitus with severe nonproliferative diabetic retinopathy without macular edema,             |
| E11.3513 | Diabetes | Type 2 diabetes mellitus with proliferative diabetic retinopathy with macular edema, bilateral                |
| E11.3593 | Diabetes | Type 2 diabetes mellitus with proliferative diabetic retinopathy without macular edema, bilateral             |
| E11.3599 | Diabetes | Type 2 diabetes mellitus with proliferative diabetic retinopathy without macular edema, unspecified eye       |
| E11.36   | Diabetes | Type 2 diabetes mellitus with diabetic cataract                                                               |
| E11.37X3 | Diabetes | Type 2 diabetes mellitus with diabetic macular edema, resolved following treatment, bilateral                 |
| E11.39   | Diabetes | Type 2 diabetes mellitus with other diabetic ophthalmic complication                                          |
| E11.40   | Diabetes | Type 2 diabetes mellitus with diabetic neuropathy, unspecified                                                |
| E11.41   | Diabetes | Type 2 diabetes mellitus with diabetic mononeuropathy                                                         |
| E11.42   | Diabetes | Type 2 diabetes mellitus with diabetic polyneuropathy                                                         |
| E11.43   | Diabetes | Type 2 diabetes mellitus with diabetic autonomic (poly)neuropathy                                             |
| E11.49   | Diabetes | Type 2 diabetes mellitus with other diabetic neurological complication                                        |
| E11.51   | Diabetes | Type 2 diabetes mellitus with diabetic peripheral angiopathy without gangrene                                 |
| E11.52   | Diabetes | Type 2 diabetes mellitus with diabetic peripheral angiopathy with gangrene                                    |
| E11.59   | Diabetes | Type 2 diabetes mellitus with other circulatory complications                                                 |

|          |                              |                                                                                                                                                                 |
|----------|------------------------------|-----------------------------------------------------------------------------------------------------------------------------------------------------------------|
| E11.621  | Diabetes                     | Type 2 diabetes mellitus with foot ulcer                                                                                                                        |
| E11.622  | Diabetes                     | Type 2 diabetes mellitus with other skin ulcer                                                                                                                  |
| E11.628  | Diabetes                     | Type 2 diabetes mellitus with other skin complications                                                                                                          |
| E11.649  | Diabetes                     | Type 2 diabetes mellitus with hypoglycemia without coma                                                                                                         |
| E11.65   | Diabetes                     | Type 2 diabetes mellitus with hyperglycemia                                                                                                                     |
| E11.69   | Diabetes                     | Type 2 diabetes mellitus with other specified complication                                                                                                      |
| E11.8    | Diabetes                     | Type 2 diabetes mellitus with unspecified complications                                                                                                         |
| E11.9    | Diabetes                     | Type 2 diabetes mellitus without complications                                                                                                                  |
| E13.319  | Diabetes                     | Other specified diabetes mellitus with unspecified diabetic retinopathy without macular edema                                                                   |
| E13.3299 | Diabetes                     | Other specified diabetes mellitus with mild nonproliferative diabetic retinopathy without macular edema, unspecified eye                                        |
| E13.43   | Diabetes                     | Other specified diabetes mellitus with diabetic autonomic (poly)neuropathy                                                                                      |
| E13.49   | Diabetes                     | Other specified diabetes mellitus with other diabetic neurological complication                                                                                 |
| E13.621  | Diabetes                     | Other specified diabetes mellitus with foot ulcer                                                                                                               |
| E13.9    | Diabetes                     | Other specified diabetes mellitus without complications                                                                                                         |
| J41.0    | COPD                         | Simple chronic bronchitis                                                                                                                                       |
| J41.1    | COPD                         | Mucopurulent chronic bronchitis                                                                                                                                 |
| J41.8    | COPD                         | Mixed simple and mucopurulent chronic bronchitis                                                                                                                |
| J42      | COPD                         | Unspecified chronic bronchitis                                                                                                                                  |
| J43.0    | COPD                         | Unilateral pulmonary emphysema [macleod's syndrome]                                                                                                             |
| J43.1    | COPD                         | Panlobular emphysema                                                                                                                                            |
| J43.2    | COPD                         | Centrilobular emphysema                                                                                                                                         |
| J43.8    | COPD                         | Other emphysema                                                                                                                                                 |
| J43.9    | COPD                         | Emphysema, unspecified                                                                                                                                          |
| J44.0    | COPD                         | Chronic obstructive pulmonary disease with acute lower respiratory infection                                                                                    |
| J44.1    | COPD                         | Chronic obstructive pulmonary disease with (acute) exacerbation                                                                                                 |
| J44.9    | COPD                         | Chronic obstructive pulmonary disease, unspecified                                                                                                              |
| I10      | CVD                          | Essential (primary) hypertension                                                                                                                                |
| I11.0    | CVD                          | Hypertensive heart disease with heart failure                                                                                                                   |
| I11.9    | CVD                          | Hypertensive heart disease without heart failure                                                                                                                |
| I13.0    | CVD                          | Hypertensive heart and chronic kidney disease with heart failure and stage 1 through stage 4 chronic kidney disease, or unspecified chronic kidney disease      |
| I13.10   | CVD                          | Hypertensive heart and chronic kidney disease without heart failure, with stage 1 through stage 4 chronic kidney disease, or unspecified chronic kidney disease |
| I13.2    | CVD                          | Hypertensive heart and chronic kidney disease with heart failure and with stage 5 chronic kidney disease, or end stage renal disease                            |
| I15.1    | CVD                          | Hypertension secondary to other renal disorders                                                                                                                 |
| I15.2    | CVD                          | Hypertension secondary to endocrine disorders                                                                                                                   |
| I15.8    | CVD                          | Other secondary hypertension                                                                                                                                    |
| I15.9    | CVD                          | Secondary hypertension, unspecified                                                                                                                             |
| I16.0    | CVD                          | Hypertensive urgency                                                                                                                                            |
| I16.1    | CVD                          | Hypertensive emergency                                                                                                                                          |
| I16.9    | CVD                          | Hypertensive crisis, unspecified                                                                                                                                |
| I24.8    | CVD                          | Other forms of acute ischemic heart disease                                                                                                                     |
| I24.9    | CVD                          | Acute ischemic heart disease, unspecified                                                                                                                       |
| I25.10   | CVD                          | Atherosclerotic heart disease of native coronary artery without angina pectoris                                                                                 |
| I25.110  | CVD                          | Atherosclerotic heart disease of native coronary artery with unstable angina pectoris                                                                           |
| I25.111  | CVD                          | Atherosclerotic heart disease of native coronary artery with angina pectoris with documented spasm                                                              |
| I25.118  | CVD                          | Atherosclerotic heart disease of native coronary artery with other forms of angina pectoris                                                                     |
| I25.119  | CVD                          | Atherosclerotic heart disease of native coronary artery with unspecified angina pectoris                                                                        |
| I25.5    | CVD                          | Ischemic cardiomyopathy                                                                                                                                         |
| I25.700  | CVD                          | Atherosclerosis of coronary artery bypass graft(s), unspecified, with unstable angina pectoris                                                                  |
| I25.701  | CVD                          | Atherosclerosis of coronary artery bypass graft(s), unspecified, with angina pectoris with documented                                                           |
| I25.708  | CVD                          | Atherosclerosis of coronary artery bypass graft(s), unspecified, with other forms of angina pectoris                                                            |
| I25.709  | CVD                          | Atherosclerosis of coronary artery bypass graft(s), unspecified, with unspecified angina pectoris                                                               |
| I25.710  | CVD                          | Atherosclerosis of autologous vein coronary artery bypass graft(s) with unstable angina pectoris                                                                |
| I25.711  | CVD                          | Atherosclerosis of autologous vein coronary artery bypass graft(s) with angina pectoris with documented                                                         |
| I25.718  | CVD                          | Atherosclerosis of autologous vein coronary artery bypass graft(s) with other forms of angina pectoris                                                          |
| I25.719  | CVD                          | Atherosclerosis of autologous vein coronary artery bypass graft(s) with unspecified angina pectoris                                                             |
| I25.720  | CVD                          | Atherosclerosis of autologous artery coronary artery bypass graft(s) with unstable angina pectoris                                                              |
| I25.728  | CVD                          | Atherosclerosis of autologous artery coronary artery bypass graft(s) with other forms of angina pectoris                                                        |
| I25.729  | CVD                          | Atherosclerosis of autologous artery coronary artery bypass graft(s) with unspecified angina pectoris                                                           |
| I25.790  | CVD                          | Atherosclerosis of other coronary artery bypass graft(s) with unstable angina pectoris                                                                          |
| I25.810  | CVD                          | Atherosclerosis of coronary artery bypass graft(s) without angina pectoris                                                                                      |
| I25.811  | CVD                          | Atherosclerosis of native coronary artery of transplanted heart without angina pectoris                                                                         |
| I25.82   | CVD                          | Chronic total occlusion of coronary artery                                                                                                                      |
| I25.83   | CVD                          | Coronary atherosclerosis due to lipid rich plaque                                                                                                               |
| I25.84   | CVD                          | Coronary atherosclerosis due to calcified coronary lesion                                                                                                       |
| I25.9    | CVD                          | Chronic ischemic heart disease, unspecified                                                                                                                     |
| I51.89   | CVD                          | Other ill-defined heart diseases                                                                                                                                |
| I51.9    | CVD                          | Heart disease, unspecified                                                                                                                                      |
| I10      | CVD with Stroke/Heart Attack | Essential (primary) hypertension                                                                                                                                |

|         |                              |                                                                                                                                                                 |
|---------|------------------------------|-----------------------------------------------------------------------------------------------------------------------------------------------------------------|
| I11.0   | CVD with Stroke/Heart Attack | Hypertensive heart disease with heart failure                                                                                                                   |
| I11.9   | CVD with Stroke/Heart Attack | Hypertensive heart disease without heart failure                                                                                                                |
| I13.0   | CVD with Stroke/Heart Attack | Hypertensive heart and chronic kidney disease with heart failure and stage 1 through stage 4 chronic kidney disease, or unspecified chronic kidney disease      |
| I13.10  | CVD with Stroke/Heart Attack | Hypertensive heart and chronic kidney disease without heart failure, with stage 1 through stage 4 chronic kidney disease, or unspecified chronic kidney disease |
| I13.2   | CVD with Stroke/Heart Attack | Hypertensive heart and chronic kidney disease with heart failure and with stage 5 chronic kidney disease, or end stage renal disease                            |
| I15.0   | CVD with Stroke/Heart Attack | Renovascular hypertension                                                                                                                                       |
| I15.1   | CVD with Stroke/Heart Attack | Hypertension secondary to other renal disorders                                                                                                                 |
| I15.2   | CVD with Stroke/Heart Attack | Hypertension secondary to endocrine disorders                                                                                                                   |
| I15.8   | CVD with Stroke/Heart Attack | Other secondary hypertension                                                                                                                                    |
| I15.9   | CVD with Stroke/Heart Attack | Secondary hypertension, unspecified                                                                                                                             |
| I16.0   | CVD with Stroke/Heart Attack | Hypertensive urgency                                                                                                                                            |
| I16.1   | CVD with Stroke/Heart Attack | Hypertensive emergency                                                                                                                                          |
| I16.9   | CVD with Stroke/Heart Attack | Hypertensive crisis, unspecified                                                                                                                                |
| I21.02  | CVD with Stroke/Heart Attack | St elevation (STEMI) myocardial infarction involving left anterior descending coronary artery                                                                   |
| I21.09  | CVD with Stroke/Heart Attack | St elevation (STEMI) myocardial infarction involving other coronary artery of anterior wall                                                                     |
| I21.11  | CVD with Stroke/Heart Attack | St elevation (STEMI) myocardial infarction involving right coronary artery                                                                                      |
| I21.19  | CVD with Stroke/Heart Attack | St elevation (STEMI) myocardial infarction involving other coronary artery of inferior wall                                                                     |
| I21.21  | CVD with Stroke/Heart Attack | St elevation (STEMI) myocardial infarction involving left circumflex coronary artery                                                                            |
| I21.29  | CVD with Stroke/Heart Attack | St elevation (STEMI) myocardial infarction involving other sites                                                                                                |
| I21.3   | CVD with Stroke/Heart Attack | St elevation (STEMI) myocardial infarction of unspecified site                                                                                                  |
| I21.4   | CVD with Stroke/Heart Attack | Non-ST elevation (NSTEMI) myocardial infarction                                                                                                                 |
| I21.9   | CVD with Stroke/Heart Attack | Acute myocardial infarction, unspecified                                                                                                                        |
| I21.A1  | CVD with Stroke/Heart Attack | Myocardial infarction type 2                                                                                                                                    |
| I24.8   | CVD with Stroke/Heart Attack | Other forms of acute ischemic heart disease                                                                                                                     |
| I24.9   | CVD with Stroke/Heart Attack | Acute ischemic heart disease, unspecified                                                                                                                       |
| I25.10  | CVD with Stroke/Heart Attack | Atherosclerotic heart disease of native coronary artery without angina pectoris                                                                                 |
| I25.110 | CVD with Stroke/Heart Attack | Atherosclerotic heart disease of native coronary artery with unstable angina pectoris                                                                           |
| I25.111 | CVD with Stroke/Heart Attack | Atherosclerotic heart disease of native coronary artery with angina pectoris with documented spasm                                                              |
| I25.118 | CVD with Stroke/Heart Attack | Atherosclerotic heart disease of native coronary artery with other forms of angina pectoris                                                                     |
| I25.119 | CVD with Stroke/Heart Attack | Atherosclerotic heart disease of native coronary artery with unspecified angina pectoris                                                                        |
| I25.5   | CVD with Stroke/Heart Attack | Ischemic cardiomyopathy                                                                                                                                         |
| I25.700 | CVD with Stroke/Heart Attack | Atherosclerosis of coronary artery bypass graft(s), unspecified, with unstable angina pectoris                                                                  |
| I25.701 | CVD with Stroke/Heart Attack | Atherosclerosis of coronary artery bypass graft(s), unspecified, with angina pectoris with documented                                                           |
| I25.708 | CVD with Stroke/Heart Attack | Atherosclerosis of coronary artery bypass graft(s), unspecified, with other forms of angina pectoris                                                            |
| I25.709 | CVD with Stroke/Heart Attack | Atherosclerosis of coronary artery bypass graft(s), unspecified, with unspecified angina pectoris                                                               |
| I25.710 | CVD with Stroke/Heart Attack | Atherosclerosis of autologous vein coronary artery bypass graft(s) with unstable angina pectoris                                                                |
| I25.711 | CVD with Stroke/Heart Attack | Atherosclerosis of autologous vein coronary artery bypass graft(s) with angina pectoris with documented                                                         |
| I25.718 | CVD with Stroke/Heart Attack | Atherosclerosis of autologous vein coronary artery bypass graft(s) with other forms of angina pectoris                                                          |
| I25.719 | CVD with Stroke/Heart Attack | Atherosclerosis of autologous vein coronary artery bypass graft(s) with unspecified angina pectoris                                                             |
| I25.720 | CVD with Stroke/Heart Attack | Atherosclerosis of autologous artery coronary artery bypass graft(s) with unstable angina pectoris                                                              |
| I25.728 | CVD with Stroke/Heart Attack | Atherosclerosis of autologous artery coronary artery bypass graft(s) with other forms of angina pectoris                                                        |
| I25.729 | CVD with Stroke/Heart Attack | Atherosclerosis of autologous artery coronary artery bypass graft(s) with unspecified angina pectoris                                                           |
| I25.790 | CVD with Stroke/Heart Attack | Atherosclerosis of other coronary artery bypass graft(s) with unstable angina pectoris                                                                          |
| I25.810 | CVD with Stroke/Heart Attack | Atherosclerosis of coronary artery bypass graft(s) without angina pectoris                                                                                      |
| I25.811 | CVD with Stroke/Heart Attack | Atherosclerosis of native coronary artery of transplanted heart without angina pectoris                                                                         |
| I25.82  | CVD with Stroke/Heart Attack | Chronic total occlusion of coronary artery                                                                                                                      |
| I25.83  | CVD with Stroke/Heart Attack | Coronary atherosclerosis due to lipid rich plaque                                                                                                               |
| I25.84  | CVD with Stroke/Heart Attack | Coronary atherosclerosis due to calcified coronary lesion                                                                                                       |
| I25.9   | CVD with Stroke/Heart Attack | Chronic ischemic heart disease, unspecified                                                                                                                     |
| I51.89  | CVD with Stroke/Heart Attack | Other ill-defined heart diseases                                                                                                                                |
| I51.9   | CVD with Stroke/Heart Attack | Heart disease, unspecified                                                                                                                                      |
| I63.019 | CVD with Stroke/Heart Attack | Cerebral infarction due to thrombosis of unspecified vertebral artery                                                                                           |
| I63.039 | CVD with Stroke/Heart Attack | Cerebral infarction due to thrombosis of unspecified carotid artery                                                                                             |
| I63.10  | CVD with Stroke/Heart Attack | Cerebral infarction due to embolism of unspecified precerebral artery                                                                                           |
| I63.112 | CVD with Stroke/Heart Attack | Cerebral infarction due to embolism of left vertebral artery                                                                                                    |
| I63.12  | CVD with Stroke/Heart Attack | Cerebral infarction due to embolism of basilar artery                                                                                                           |
| I63.132 | CVD with Stroke/Heart Attack | Cerebral infarction due to embolism of left carotid artery                                                                                                      |
| I63.133 | CVD with Stroke/Heart Attack | Cerebral infarction due to embolism of bilateral carotid arteries                                                                                               |
| I63.139 | CVD with Stroke/Heart Attack | Cerebral infarction due to embolism of unspecified carotid artery                                                                                               |
| I63.19  | CVD with Stroke/Heart Attack | Cerebral infarction due to embolism of other precerebral artery                                                                                                 |
| I63.20  | CVD with Stroke/Heart Attack | Cerebral infarction due to unspecified occlusion or stenosis of unspecified precerebral arteries                                                                |
| I63.212 | CVD with Stroke/Heart Attack | Cerebral infarction due to unspecified occlusion or stenosis of left vertebral arteries                                                                         |
| I63.219 | CVD with Stroke/Heart Attack | Cerebral infarction due to unspecified occlusion or stenosis of unspecified vertebral arteries                                                                  |
| I63.22  | CVD with Stroke/Heart Attack | Cerebral infarction due to unspecified occlusion or stenosis of basilar arteries                                                                                |
| I63.232 | CVD with Stroke/Heart Attack | Cerebral infarction due to unspecified occlusion or stenosis of left carotid arteries                                                                           |
| I63.233 | CVD with Stroke/Heart Attack | Cerebral infarction due to unspecified occlusion or stenosis of bilateral carotid arteries                                                                      |
| I63.239 | CVD with Stroke/Heart Attack | Cerebral infarction due to unspecified occlusion or stenosis of unspecified carotid arteries                                                                    |
| I63.30  | CVD with Stroke/Heart Attack | Cerebral infarction due to thrombosis of unspecified cerebral artery                                                                                            |
| I63.323 | CVD with Stroke/Heart Attack | Cerebral infarction due to thrombosis of bilateral anterior cerebral arteries                                                                                   |

|         |                              |                                                                                                       |
|---------|------------------------------|-------------------------------------------------------------------------------------------------------|
| I63.329 | CVD with Stroke/Heart Attack | Cerebral infarction due to thrombosis of unspecified anterior cerebral artery                         |
| I63.342 | CVD with Stroke/Heart Attack | Cerebral infarction due to thrombosis of left cerebellar artery                                       |
| I63.39  | CVD with Stroke/Heart Attack | Cerebral infarction due to thrombosis of other cerebral artery                                        |
| I63.40  | CVD with Stroke/Heart Attack | Cerebral infarction due to embolism of unspecified cerebral artery                                    |
| I63.411 | CVD with Stroke/Heart Attack | Cerebral infarction due to embolism of right middle cerebral artery                                   |
| I63.412 | CVD with Stroke/Heart Attack | Cerebral infarction due to embolism of left middle cerebral artery                                    |
| I63.413 | CVD with Stroke/Heart Attack | Cerebral infarction due to embolism of bilateral middle cerebral arteries                             |
| I63.419 | CVD with Stroke/Heart Attack | Cerebral infarction due to embolism of unspecified middle cerebral artery                             |
| I63.421 | CVD with Stroke/Heart Attack | Cerebral infarction due to embolism of right anterior cerebral artery                                 |
| I63.423 | CVD with Stroke/Heart Attack | Cerebral infarction due to embolism of bilateral anterior cerebral arteries                           |
| I63.431 | CVD with Stroke/Heart Attack | Cerebral infarction due to embolism of right posterior cerebral artery                                |
| I63.432 | CVD with Stroke/Heart Attack | Cerebral infarction due to embolism of left posterior cerebral artery                                 |
| I63.433 | CVD with Stroke/Heart Attack | Cerebral infarction due to embolism of bilateral posterior cerebral arteries                          |
| I63.439 | CVD with Stroke/Heart Attack | Cerebral infarction due to embolism of unspecified posterior cerebral artery                          |
| I63.442 | CVD with Stroke/Heart Attack | Cerebral infarction due to embolism of left cerebellar artery                                         |
| I63.49  | CVD with Stroke/Heart Attack | Cerebral infarction due to embolism of other cerebral artery                                          |
| I63.50  | CVD with Stroke/Heart Attack | Cerebral infarction due to unspecified occlusion or stenosis of unspecified cerebral artery           |
| I63.511 | CVD with Stroke/Heart Attack | Cerebral infarction due to unspecified occlusion or stenosis of right middle cerebral artery          |
| I63.512 | CVD with Stroke/Heart Attack | Cerebral infarction due to unspecified occlusion or stenosis of left middle cerebral artery           |
| I63.521 | CVD with Stroke/Heart Attack | Cerebral infarction due to unspecified occlusion or stenosis of right anterior cerebral artery        |
| I63.529 | CVD with Stroke/Heart Attack | Cerebral infarction due to unspecified occlusion or stenosis of unspecified anterior cerebral artery  |
| I63.531 | CVD with Stroke/Heart Attack | Cerebral infarction due to unspecified occlusion or stenosis of right posterior cerebral artery       |
| I63.532 | CVD with Stroke/Heart Attack | Cerebral infarction due to unspecified occlusion or stenosis of left posterior cerebral artery        |
| I63.539 | CVD with Stroke/Heart Attack | Cerebral infarction due to unspecified occlusion or stenosis of unspecified posterior cerebral artery |
| I63.541 | CVD with Stroke/Heart Attack | Cerebral infarction due to unspecified occlusion or stenosis of right cerebellar artery               |
| I63.543 | CVD with Stroke/Heart Attack | Cerebral infarction due to unspecified occlusion or stenosis of bilateral cerebellar arteries         |
| I63.8   | CVD with Stroke/Heart Attack | Other cerebral infarction                                                                             |
| I63.81  | CVD with Stroke/Heart Attack | Other cerebral infarction due to occlusion or stenosis of small artery                                |
| I63.89  | CVD with Stroke/Heart Attack | Other cerebral infarction                                                                             |
| I63.9   | CVD with Stroke/Heart Attack | Cerebral infarction, unspecified                                                                      |

**Supplementary Table S1.** Comorbidities evaluated.



**Supporting Information – Table S2**

| <b>Multivariable model 5: adjusted for demographic and socioeconomic factors + marital status + comorbidities</b>                                                 | <b>OR [95% CI]</b>                                                                                                | <b>p-value</b>                              |
|-------------------------------------------------------------------------------------------------------------------------------------------------------------------|-------------------------------------------------------------------------------------------------------------------|---------------------------------------------|
| Walkability: Car-dependent (walk score 0-49)<br>Somewhat walkable (walk score 50-69)<br>Very walkable (walk score 70-89)<br>Walker's paradise (walk score 90-100) | 1 (reference)<br>0.545 [0.336 - 0.874]<br>1.356 [0.850 - 2.166]<br>2.868 [1.480 - 5.732]                          | NA<br>0.0127*<br>0.2017<br>0.0022**         |
| Legal Sex: Female<br>Male                                                                                                                                         | 1 (reference)<br>0.990 [0.676 - 1.453]                                                                            | NA<br>0.9609                                |
| Race: White<br>Asian<br>Black<br>Other<br>Unknown/Missing                                                                                                         | 1 (reference)<br>0.530 [0.164 - 1.605]<br>0.515 [0.268 - 0.980]<br>0.567 [0.262 - 1.221]<br>0.474 [0.198 - 1.118] | NA<br>0.2705<br>0.0447<br>0.1470<br>0.0888  |
| Ethnicity: Non-Hispanic<br>Hispanic<br>Unknown/missing                                                                                                            | 1 (reference)<br>0.769 [0.205 - 2.847]<br>0.653 [0.374 - 1.125]                                                   | NA<br>0.6935<br>0.1283                      |
| Median Household Income                                                                                                                                           | 1.000 [1.000 - 1.000]                                                                                             | 0.3173                                      |
| Marital Status: Married/Partnered<br>Divorced/Legally Separated<br>Other/Unknown<br>Single<br>Widowed                                                             | 1 (reference)<br>1.479 [0.779 - 2.829]<br>1.273 [0.422 - 3.577]<br>1.942 [1.163 - 3.268]<br>1.449 [0.922 - 2.280] | NA<br>0.2323<br>0.6542<br>0.0116*<br>0.1078 |
| Past/current diabetes diagnosis: No<br>Yes                                                                                                                        | 1 (reference)<br>1.634 [1.106 - 2.425]                                                                            | NA<br>0.0141*                               |
| Past/current cancer diagnosis: No<br>Yes                                                                                                                          | 1 (reference)<br>0.974 [0.685 - 1.383]                                                                            | NA<br>0.8838                                |
| Past/current dementia diagnosis: No<br>Yes                                                                                                                        | 1 (reference)<br>5.096 [3.251 - 8.182]                                                                            | NA<br>4.1x10 <sup>-12</sup> ***             |
| Past/current COPD diagnosis: No<br>Yes                                                                                                                            | 1 (reference)<br>2.478 [1.545 - 4.037]                                                                            | NA<br>0.0002***                             |
| Past/current CVD diagnosis: No<br>Yes                                                                                                                             | 1 (reference)<br>1.374 [0.886 - 2.141]                                                                            | NA<br>0.1579                                |
| <b>Multivariable model 6: adjusted for demographic and socioeconomic factors + marital status + comorbidities + BMI categories</b>                                | <b>OR [95% CI]</b>                                                                                                | <b>p-value</b>                              |
| Walkability: Car-dependent (walk score 0-49)<br>Somewhat walkable (walk score 50-69)<br>Very walkable (walk score 70-89)<br>Walker's paradise (walk score 90-100) | 1 (reference)<br>0.554 [0.324 - 0.939]<br>1.528 [0.921 - 2.543]<br>3.413 [1.673 - 7.204]                          | NA<br>0.0299*<br>0.1011<br>0.0009***        |
| Legal Sex: Female<br>Male                                                                                                                                         | 1 (reference)<br>1.107 [0.730 - 1.681]]                                                                           | NA<br>0.6320                                |
| Race: White<br>Asian<br>Black<br>Other<br>Unknown/Missing                                                                                                         | 1 (reference)<br>0.446 [0.132 - 1.408]<br>0.566 [0.278 - 1.139]<br>0.440 [0.182 - 1.048]<br>0.509 [0.201 - 1.277] | NA<br>0.1764<br>0.1131<br>0.0651<br>0.1500  |
| Ethnicity: Non-Hispanic<br>Hispanic<br>Unknown/missing                                                                                                            | 1 (reference)<br>1.765 [0.417 - 7.991]<br>0.617 [0.336 - 1.110]                                                   | NA<br>0.4458<br>0.1120                      |

|                                                                                                       |                                                                                                                   |                                            |
|-------------------------------------------------------------------------------------------------------|-------------------------------------------------------------------------------------------------------------------|--------------------------------------------|
| Median Household Income                                                                               | 1.000 [1.000 - 1.000]                                                                                             | 0.6616                                     |
| Marital Status: Married/Partnered<br>Divorced/Legally Separated<br>Single<br>Widowed<br>Other/Unknown | 1 (reference)<br>1.657 [0.839 - 3.299]<br>1.563 [0.874 - 2.801]<br>1.597 [0.978 - 2.616]<br>1.749 [0.511 - 5.628] | NA<br>0.1468<br>0.1319<br>0.0618<br>0.3530 |
| Past/current diabetes diagnosis: No<br>Yes                                                            | 1 (reference)<br>2.095 [1.372 - 3.222]                                                                            | NA<br>0.0007***                            |
| Past/current cancer diagnosis: No<br>Yes                                                              | 1 (reference)<br>1.038 [0.712 - 1.511]                                                                            | NA<br>0.8469                               |
| Past/current dementia diagnosis: No<br>Yes                                                            | 1 (reference)<br>5.039 [3.122 - 8.338]                                                                            | NA<br>9.87x10 <sup>-11</sup> ***           |
| Past/current COPD diagnosis: No<br>Yes                                                                | 1 (reference)<br>1.949 [1.171 - 3.282]                                                                            | NA<br>0.0110*                              |
| Past/current CVD diagnosis: No<br>Yes                                                                 | 1 (reference)<br>1.396 [0.838 - 2.351]                                                                            | NA<br>0.2035                               |
| BMI: Healthy (18.5 - 25)<br>Underweight (<18.5)<br>Overweight (25 - 30)<br>Obese (>30)                | 1 (reference)<br>1.611 [0.684 - 4.025]<br>0.517 [0.331 - 0.801]<br>0.461 [0.278 - 0.755]                          | NA<br>0.2880<br>0.0034**<br>0.0023**       |

**Supplementary Table S2.** Multivariable logistic regression models evaluating the association between walkability categories and sarcopenia, adjusted for demographic and socioeconomic factors, marital status, and further including comorbidities with CVD without stroke and/or BMI categories ( $p < 0.05$ , \*\*0.01 or \*\*\*0.001). For the model including BMI categories, only those with available data for BMI were used (291 sarcopenia cases and 315 control subjects). COPD: chronic obstructive pulmonary disease, CVD: cardiovascular diseases.
