# Supplementary material for: Walkable urban zip codes and specific chronic diseases are associated with Sarcopenia
Source: Research Square preprint supplement (doi:10.21203/rs.3.rs-5751166/v1), 2025-12-04
Supplement: Supplementary file 1 [file fee0d12f7f7e223fb444fd8b.docx]

**Tables**

|  | **Overall**  **(N=685)** | **Controls**  **(n=342)** | **Sarcopenia cases**  **(n=343)** | **p-value** |
| --- | --- | --- | --- | --- |
| Walk score (mean ± SD) | 52.9 ± 28.6 | 49.5 ± 27.1 | 56.3 ± 29.5 | 0.0018 a |
| Walkability: Car-dependent (walk score 0-49)                     Somewhat walkable (walk score 50-69)                     Very walkable (walk score 70-89)                     Walker’s paradise (walk score 90-100) | 310 (45.3%)  132 (19.3%)  180 (26.3%)  63 (9.2%) | 168 (49.1%)  83 (24.3%)  73 (21.3%)  18 (5.3%) | 142 (41.4%)  49 (14.3%)  107 (31.2%)  45 (13.1%) | 2.316x10-6 b |
| Legal sex: Female                    Male | 398 (58.1%)  287 (41.9%) | 197 (57.6%)  145 (42.4%) | 201 (58.6%)  142 (41.4%) | 0.8514 b |
| Race: Asian            Black or African American   Native American or Alaska Native   White   Two or more races   Other   Unknown (declined or unavailable/missing) | 19 (2.8%)  65 (9.5%)  1 (0.1%)  517 (75.5%)  5 (0.7%)  39 (5.7%)  39 (5.7%) | 11 (3.2%)  33 (9.6%)  1 (0.3%)  257 (75.1%)  4 (1.2%)  17 (5.0%)  19 (5.6%) | 8 (2.3%)  32 (9.3%)  0 (0%)  260 (75.8%)  1 (0.3%)  22 (6.4%)  20 (5.8%) | 0.7370 c |
| Ethnicity: Hispanic              Non-Hispanic              Unknown (declined or unavailable/missing) | 14 (2.0%)  589 (86.0%)  82 (12.0%) | 7 (2.0%)  286 (83.6%)  49 (14.3%) | 7 (2.0%)  303 (88.3%)  33 (9.6%) | 0.1644 b |
| Median household income | 109056.8 ± 42693.2 | 112554.5 ± 41549.2 | 105569.3 ± 43585.5 | 0.0322 a |
| Marital Status: Divorced       Legally Separated           Married               Partnered  Widowed  Single  Other  Unknown (declined or unknown) | 51 (7.4%)  9 (1.3%)  313 (45.7%)  5 (0.73%)  178 (26.0%)  108 (15.8%)  4 (0.6%)  17 (2.5%) | 20 (5.8%)  5 (1.5%)  183 (53.5%)  1 (0.3%)  78 (22.8%)  41 (12.0%)  3 (0.9%)  11 (3.2%) | 31 (9.0%)  4 (1.2%)  130 (37.9%)  4 (1.2%)  100 (29.2%)  67 (19.5%)  1 (0.3%)  6 (1.7%) | 0.0005 c |
| Characteristics of sarcopenia diagnosis among cases:       Age of first sarcopenia diagnosis  Hospital encounter type:        Outpatient encounter        Inpatient encounter        Both out and inpatient encounters | NA | NA | 77.53 ±11.47  244 (71.14%)  95 (27.70%)  4 (1.17%) | NA |
| BMI (among 291 cases + 315 controls with data available)  Underweight (<18.5)  Healthy (≥18.5 - <25)  Overweight (≥25 - <30)  Obese (≥30) | 37 (6.1%)  203 (33.5%)  214 (35.3%)  152 (25.1%) | 10 (3.4%)  93 (32.0%)  121 (41.6%)  91 (31.3%) | 27 (8.6%)  110 (34.9%)  93 (29.5%)  61 (19.4%) | 0.0005 b |

**Table 1. Patient characteristics.** aStudent’s *t*-test, bChi-squared test, or cFisher’s exact test.

|  | **OR [95% CI]** | **p-value** |
| --- | --- | --- |
| **Univariable model** |  |  |
| Walkability: Car-dependent (walk score 0-49)                     Somewhat walkable (walk score 50-69)                     Very walkable (walk score 70-89)                     Walker’s paradise (walk score 90-100) | 1 (reference)  0.698 [0.458 - 1.058]  1.734 [1.197 - 2.522]  2.958 [1.664 - 5.455] | NA  0.0923  0.0037**  0.0003*** |
| **Multivariable model 1: adjusted for demographic and socioeconomic factors** | **OR [95% CI]** | **p-value** |
| Walkability: Car-dependent (walk score 0-49)                     Somewhat walkable (walk score 50-69)                     Very walkable (walk score 70-89)                     Walker’s paradise (walk score 90-100) | 1 (reference)  0.685 [0.441 - 1.053]  1.840 [1.206 - 2.823]   3.025 [1.639 - 5.793] | NA  0.0868  0.0049**  0.0006*** |
| Legal Sex: Female                    Male | 1 (reference)  0.991 [0.717, 1.340] | NA  0.9569 |
| Race: White             Asian             Black             Other             Unknown/Missing | 1 (reference)  0.487 [0.174 - 1.301]  0.647 [0.362 - 1.150]  0.703 [0.353 - 1.394]  0.766 [0.228 - 2.354] | NA  0.1556  0.1388  0.3112  0.4731 |
| Ethnicity: Non-Hispanic                  Hispanic                  Unknown/missing | 1 (reference)  0.733 [0.228, 2.354]  0.660 [0.432,1.073] | NA  0.5952  0.0948 |
| Median Household Income | 1.000 [1.000 - 1.000] | 0.1951 |
| **Multivariable model 2: adjusted for demographic and socioeconomic factors + marital status** | **OR [95% CI]** | **p-value** |
| Walkability: Car-dependent (walk score 0-49)                     Somewhat walkable (walk score 50-69)                     Very walkable (walk score 70-89)                     Walker’s paradise (walk score 90-100) | 1 (reference)  0.647 [0.414 - 1.002]  1.648 [1.069 - 2.551]   2.624 [1.404 - 5.078] | NA  0.0529  0.0242*  0.0031** |
| Legal Sex: Female                    Male | 1 (reference)  1.212 [0.854 - 1.172] | NA  0.2842 |
| Race: White             Asian             Black             Other             Unknown | 1 (reference)  0.576 [0.203 - 1.554]  0.602 [0.332 - 1.083]  0.709 [0.354 - 1.415]  0.743 [0.350 - 1.585] | NA  0.2813  0.0911  0.3286  0.4379 |
| Ethnicity: Non-Hispanic                  Hispanic                  Unknown | 1 (reference)  0.776 [0.239 - 2.526]  0.719 [0.433 - 1.183] | NA  0.6679  0.1976 |
| Median Household Income | 1.000 [1.000, 1.000] | 0.2923 |
| Marital Status: Married/Partnered                           Divorced/Legally Separated                           Single                           Widowed  Other/Unknown | 1 (reference)  1.741 [0.957 - 3.205]  1.981 [1.227 - 3.226]  1.840 [1.215 - 2.799]  0.820 [0.289 - 2.160] | NA  0.0712  0.0055**  0.0041**  0.6949 |

**Table 2.** Univariable and multivariable logistic regression models evaluating the association between walkability categories and sarcopenia, adjusted for demographic and socioeconomic factors and marital status. COPD: chronic obstructive pulmonary disease, CVD: cardiovascular diseases.

| **Multivariable model 3: adjusted for demographic and socioeconomic factors + marital status + comorbidities** | **OR [95% CI]** | **p-value** |
| --- | --- | --- |
| Walkability: Car-dependent (walk score 0-49)                     Somewhat walkable (walk score 50-69)                     Very walkable (walk score 70-89)                     Walker’s paradise (walk score 90-100) | 1 (reference)  0.548 [0.338 - 0.880]  1.366 [0.857 - 2.181]  2.898 [1.497 - 5.788] | NA  0.0137*  0.1897  0.0020** |
| Legal Sex: Female                    Male | 1 (reference)  0.996 [0.680 - 1.461] | NA  0.9853 |
| Race: White             Asian             Black             Other             Unknown/Missing | 1 (reference)  0.525 [0.162 - 1.590]  0.512 [0.266 - 0.973]  0.566 [0.262 - 1.218]  0.476 [0.199 - 1.124] | NA  0.2634  0.0425*  0.1454  0.0910 |
| Ethnicity: Non-Hispanic                  Hispanic                  Unknown/missing | 1 (reference)  0.773 [0.206 - 2.862]  0.647 [0.371 - 1.114] | NA  0.6988  0.1200 |
| Median Household Income | 1.000 [1.000 - 1.000] | 0.3302 |
| Marital Status: Married/Partnered                           Divorced/Legally Separated                           Single                           Widowed  Other/Unknown | 1 (reference)  1.475 [0.777 - 2.818]  1.942 [1.163 - 3.268]  1.451 [0.924 - 2.284]  1.269 [0.421 - 3.569] | NA  0.2356  0.0116*  0.1064  0.6578 |
| Past/current diabetes diagnosis: No                                                   Yes | 1 (reference)  1.655 [1.122 - 2.453] | NA  0.0115* |
| Past/current cancer diagnosis: No                                                   Yes | 1 (reference)  0.977 [0.688 - 1.387] | NA  0.8951 |
| Past/current dementia diagnosis: No                                                       Yes | 1 (reference)  5.154 [3.291 - 8.270] | NA  2.71x10-12*** |
| Past/current COPD diagnosis: No                                                  Yes | 1 (reference)  2.497 [1.558 - 4.066] | NA  0.0002*** |
| Past/current CVD and stroke diagnosis: No                                                       Yes | 1 (reference)  1.320 [0.848 - 2.065] | NA  0.2204 |
| **Multivariable model 4: adjusted for demographic and socioeconomic factors + marital status + comorbidities + BMI categories** | **OR [95% CI]** | **p-value** |
| Walkability: Car-dependent (walk score 0-49)                     Somewhat walkable (walk score 50-69)                     Very walkable (walk score 70-89)                     Walker’s paradise (walk score 90-100) | 1 (reference)  0.558 [0.325 - 0.943]  1.535 [0.926 - 2.553]  3.434 [1.685 - 7.247] | NA  0.0312*  0.0972  0.0009*** |
| Legal Sex: Female                    Male | 1 (reference)  1.111 [0.733 - 1.687] | NA  0.6204 |
| Race: White             Asian            Black            Other            Unknown/Missing | 1 (reference)  0.444 [0.131 - 1.403]  0.565 [0.277 - 1.136]  0.440 [0.182 - 1.050]  0.511 [0.202 - 1.281] | NA  0.1748  0.1114  0.0655  0.1521 |
| Ethnicity: Non-Hispanic                  Hispanic                  Unknown/missing | 1 (reference)  1.770 [0.418 - 8.017]  0.612 [0.333 - 1.101] | NA  0.4437  0.1059 |
| Median Household Income | 1.000 [1.000 - 1.000] | 0.6726 |
| Marital Status: Married/Partnered                           Divorced/Legally Separated                           Single                           Widowed  Other/Unknown | 1 (reference)  1.653 [0.838 - 3.288]  1.565 [0.875 - 2.806]  1.598 [0.978 - 2.618]  1.758 [0.514 - 5.662] | NA  0.1483  0.1310  0.0615  0.3489 |
| Past/current diabetes diagnosis: No                                                   Yes | 1 (reference)  2.108 [1.383 - 3.240] | NA  0.0006*** |
| Past/current cancer diagnosis: No                                                   Yes | 1 (reference)  1.038 [0.712 - 1.511] | NA  0.8478 |
| Past/current dementia diagnosis: No                                                       Yes | 1 (reference)  5.066 [3.141 - 8.378] | NA  8.1x10-11*** |
| Past/current COPD diagnosis: No                                                  Yes | 1 (reference)  1.958 [1.177 - 3.296] | NA  0.0104* |
| Past/current CVD and stroke diagnosis: No                                                       Yes | 1 (reference)  1.381 [0.824 - 2.340] | NA  0.2250 |
| BMI: Healthy (18.5 - 25)  Underweight (<18.5)          Overweight (25 - 30)         Obese (>30) | 1 (reference)  1.610 [0.683 - 4.021]  0.516 [0.330 - 0.800]  0.459 [0.278 - 0.753] | NA  0.2889  0.0033**  0.0022** |

**Table 3.** Multivariable logistic regression models evaluating the association between walkability categories and sarcopenia, adjusted for demographic and socioeconomic factors, marital status, and further including comorbidities and/or BMI categories (p<*0.05, **0.01 or ***0.001). For the model including BMI categories, only those with available data for BMI were used (291 sarcopenia cases and 315 control subjects). COPD: chronic obstructive pulmonary disease, CVD: cardiovascular diseases.
